# Supplementary material for: Surface-modified metal sulfides as stable H2-evolving photocatalysts in Z-scheme water splitting with a [Fe(CN)6]3−/4−redox mediator under visible-light irradiation
Source: Royal Society of Chemistry journal article supplement (doi:10.1039/c7se00151g), 2017-01-01
Supplement: c7se00151g1.pdf [file c7se00151g1.pdf]

*Supplementary Information*

**Surface-modified metal sulfides as stable H<sub>2</sub>-evolving photocatalysts in Z-scheme  
water splitting with a [Fe(CN)<sub>6</sub>]<sup>3-/4-</sup> redox mediator under visible-light irradiation**

Takashi Shirakawa,<sup>a</sup> Masanobu Higashi,<sup>\*a</sup> Osamu Tomita<sup>b</sup> and Ryu Abe<sup>\*ab</sup>

<sup>a</sup>Department of Energy and Hydrocarbon Chemistry, Graduate School of Engineering, Kyoto University, Nishikyo-ku, Kyoto 615-8510, Japan.

<sup>b</sup>CREST, Japan Science and Technology Agency (JST), Kawaguchi, Saitama 332-0012, Japan

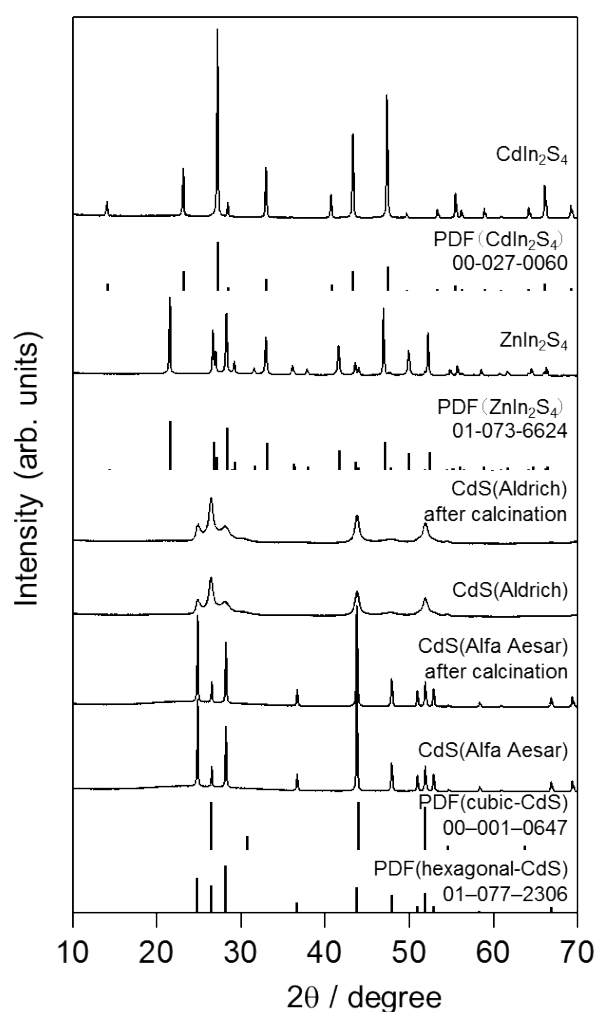

Figure S1 XRD patterns of CdS(Alfa Aesar, Aldrich) before and after calcination at 673 K, ZnIn<sub>2</sub>S<sub>4</sub> and CdIn<sub>2</sub>S<sub>4</sub> samples.

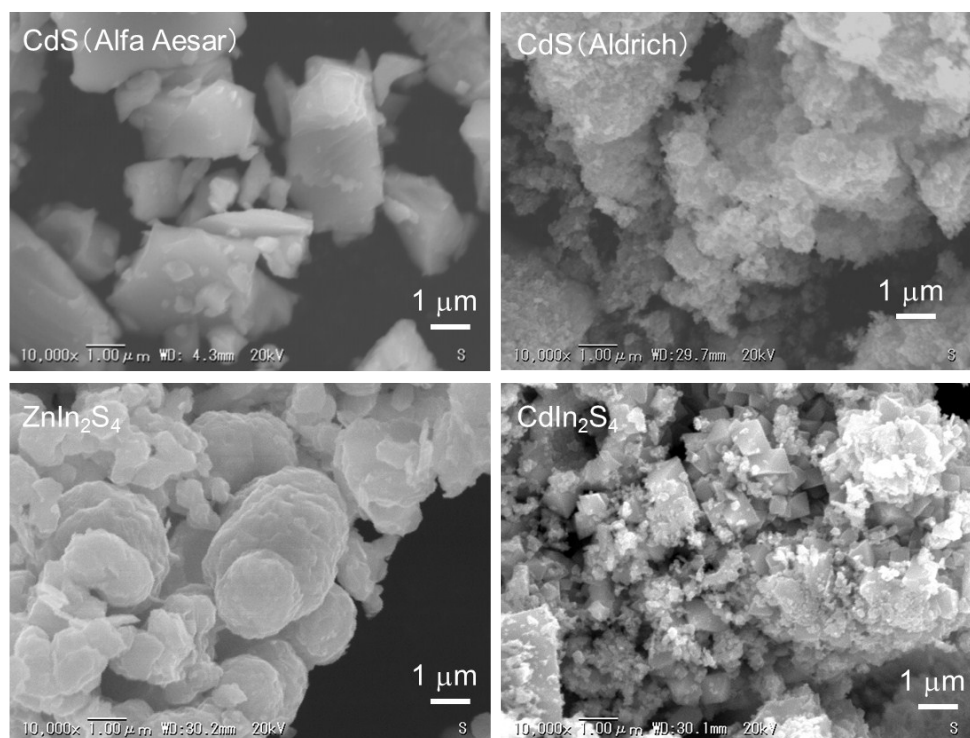

Figure S2 SEM images of CdS(Alf Aesar, Aldrich) calcined at 673 K,  $\text{ZnIn}_2\text{S}_4$  and  $\text{CdIn}_2\text{S}_4$ .

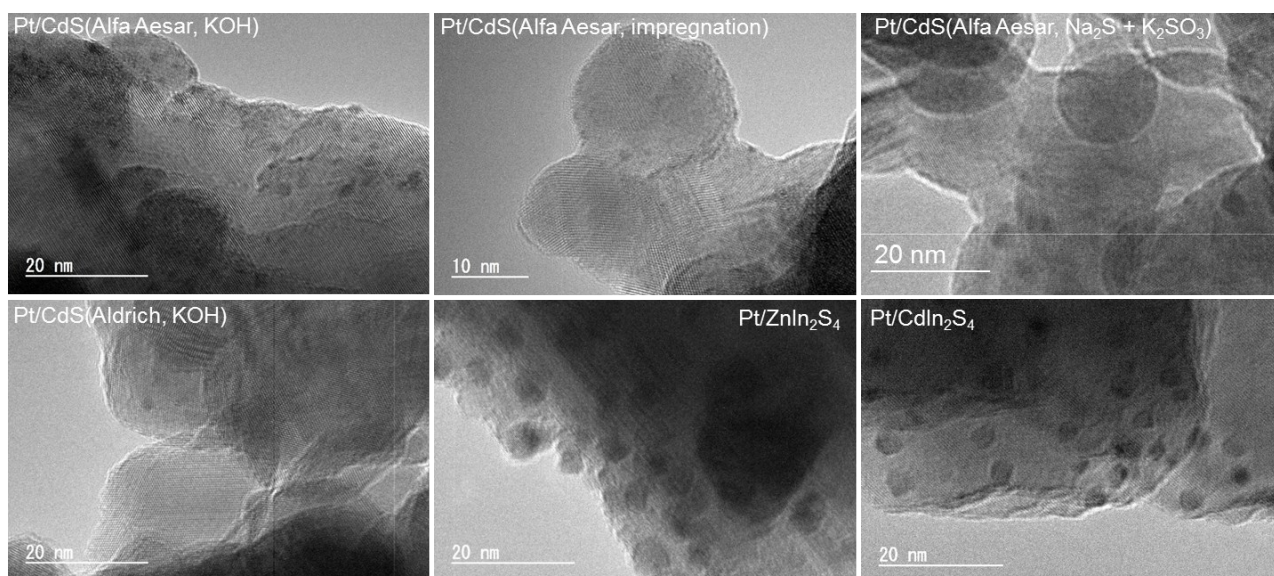

Figure S3 TEM images of various Pt-loaded metal sulfides.

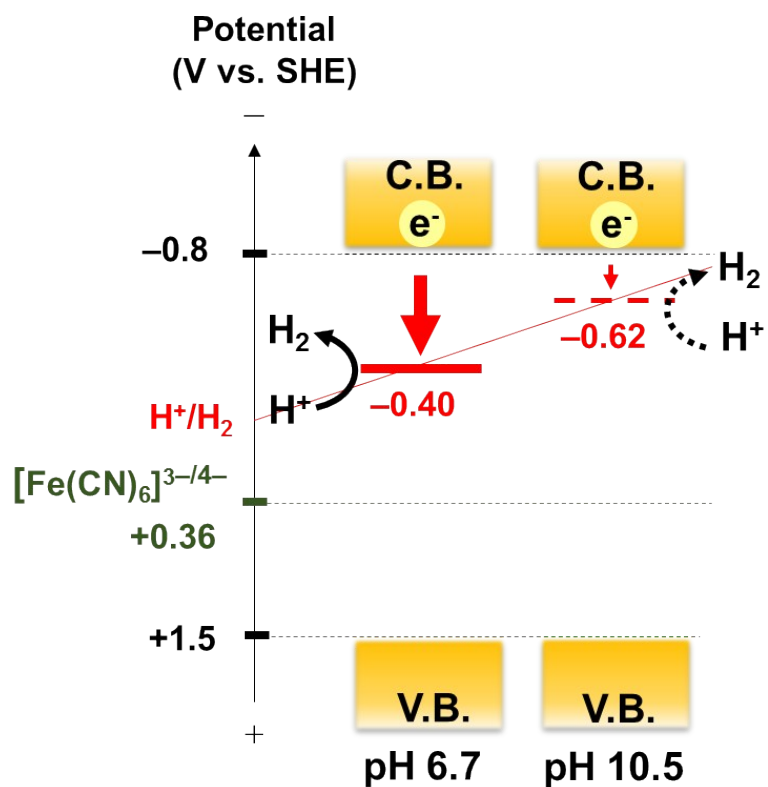

Figure S4 Illustration of influence of pH of reaction solution on initial rate of  $H_2$  evolution over Pt/CdS

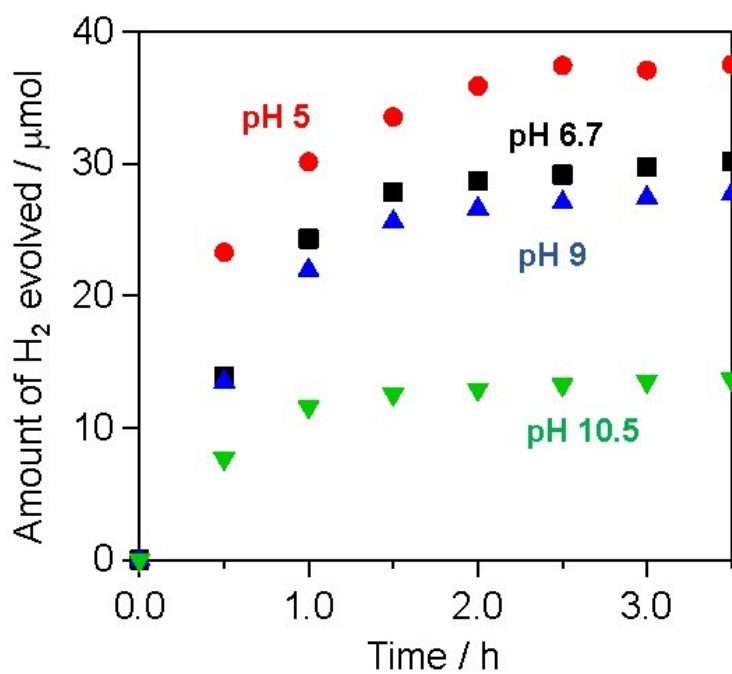

Figure S5 Time courses of  $H_2$  evolution over Pt/CdS from aqueous  $K_4[Fe(CN)_6]$  solution at different pH.

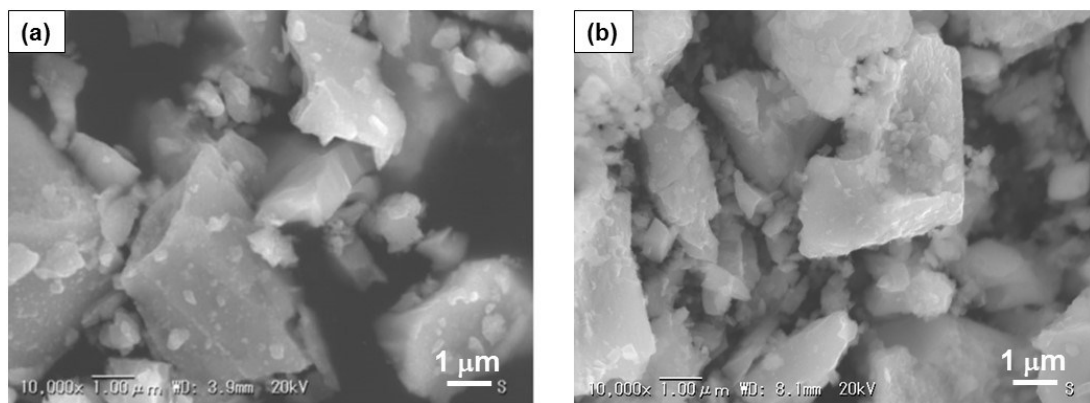

Figure S6 SEM images of Pt/CdS (a) before and (b) after reaction in BB solution (0.1 M, pH 8) containing  $\text{K}_4[\text{Fe}(\text{CN})_6]$  (5 mM).

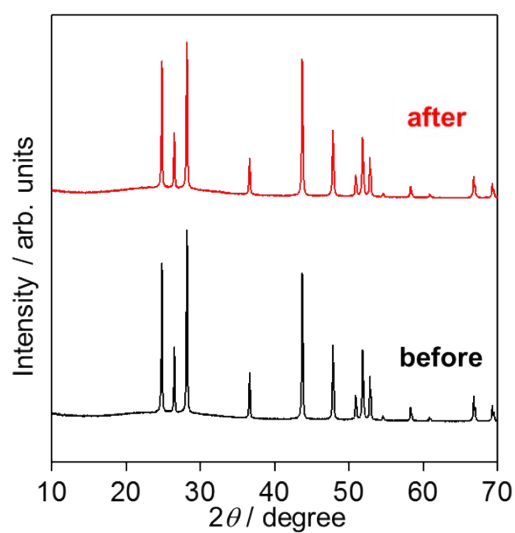

Figure S7 XRD patterns of Pt/CdS before and after reaction in BB solution (0.1 M, pH 8) containing  $\text{K}_4[\text{Fe}(\text{CN})_6]$  (5 mM).

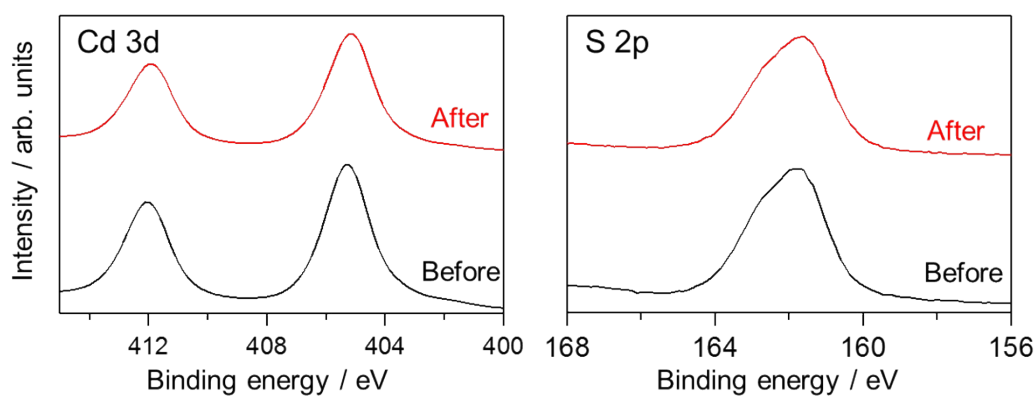

Figure S8 XPS spectra of Pt/CdS before and after reaction in BB solution (0.1 M, pH 8) containing  $\text{K}_4[\text{Fe}(\text{CN})_6]$  (5 mM).

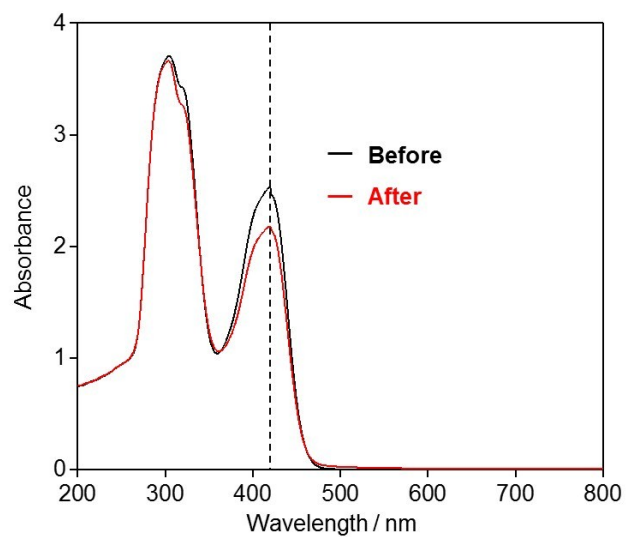

Figure S9 Photoabsorption spectra of an aqueous BB solution containing  $\text{SiO}_2$  (50 mg),  $\text{K}_4[\text{Fe}(\text{CN})_6]$  (2.5 mM), and  $\text{K}_4[\text{Fe}(\text{CN})_6]$  (2.5 mM) before and after photoirradiation ( $\lambda > 400$  nm) for 15 h.

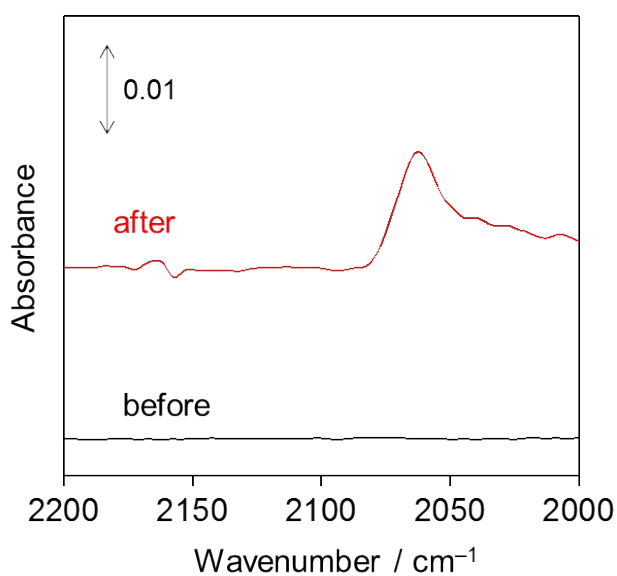

Figure S10 ATR-FTIR spectra of Pt/CdS before and after  $\text{H}_2$  evolution in the presence of  $[\text{Fe}(\text{CN})_0]^{4-}$  without borate buffer.

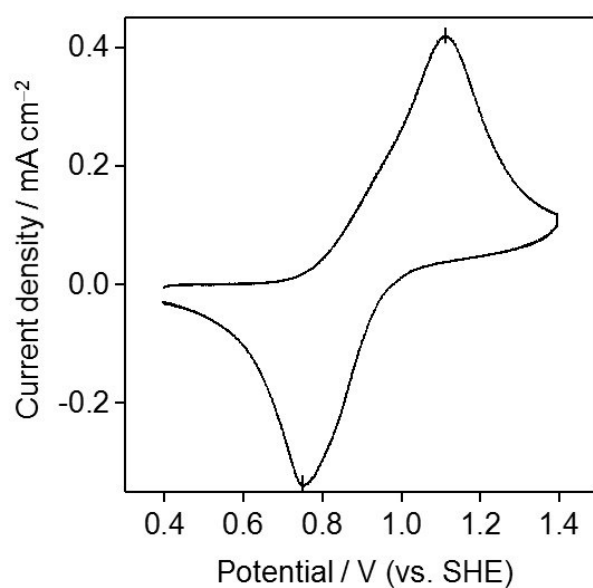

Figure S11 Cyclic voltammogram of a  $\text{K}_2[\text{CdFe}(\text{CN})_6]$  electrode in 1 M aqueous  $\text{KNO}_3$  solution.

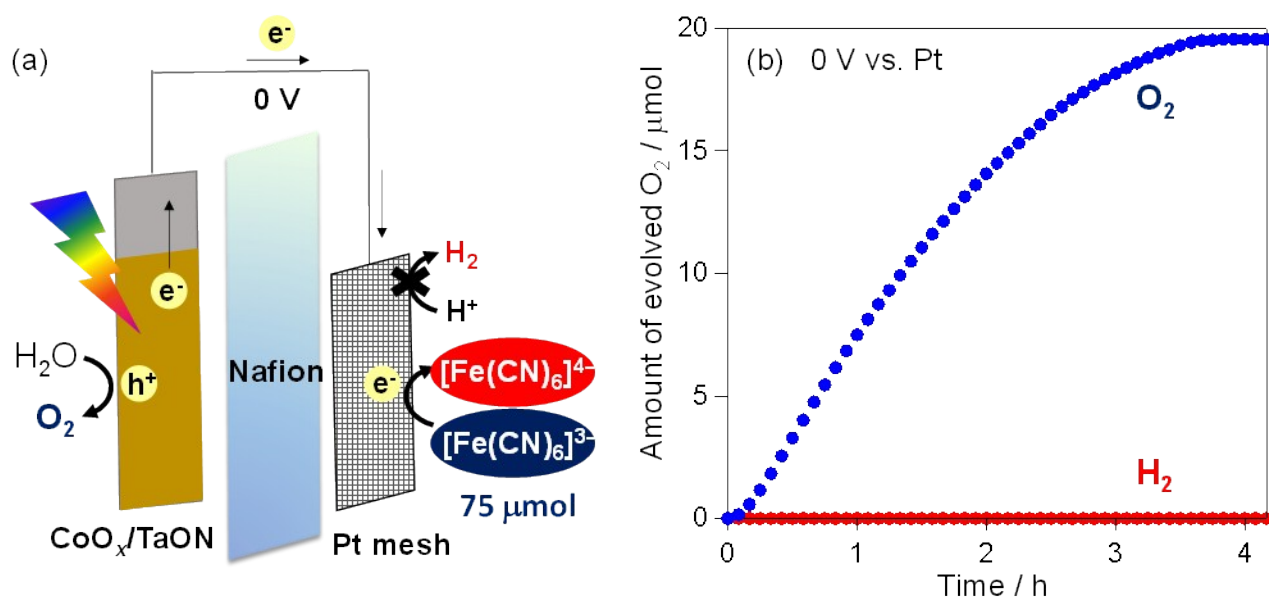

Figure S12 (a) Illustration of the reaction and (b) time course of  $\text{O}_2$  evolution over a  $\text{CoO}_x/\text{TaON}$  photoanode using two-compartment cells divided by a Nafion membrane under visible-light irradiation ( $75 \mu\text{mol K}_3[\text{Fe}(\text{CN})_6]$ ,  $0.8 \text{ M BB}$  solution ( $\text{pH } 8$ ),  $0 \text{ V vs. Pt}$  ).
